# Supplementary material for: SMCHD1 has separable roles in chromatin architecture and gene silencing that could be targeted in disease
Source: PubMed Central journal article supplement (PMC10519958; doi:10.1038/s41467-023-40992-6), 2023-09-25
Supplement: 41467_2023_40992_MOESM1_ESM.pdf [file 41467_2023_40992_MOESM1_ESM.pdf]

## Supplementary Figures

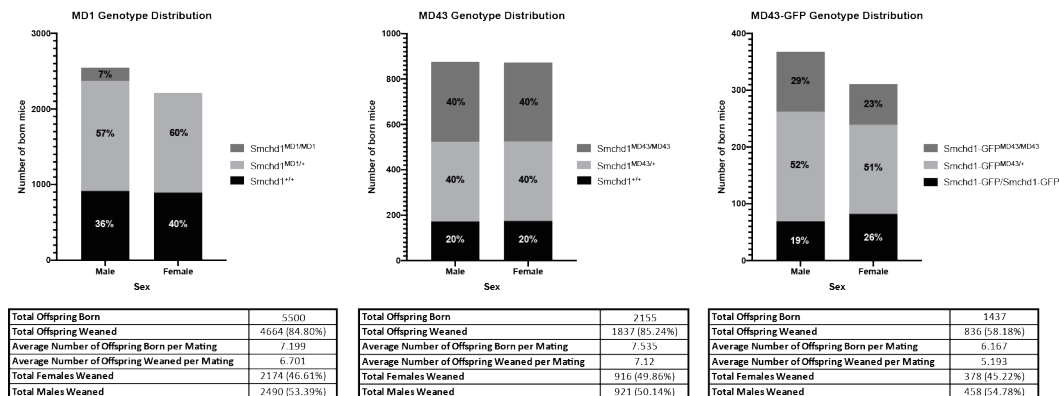

**Supplementary Figure 1.** Summarised genotype distribution data at weaning for offspring from heterozygous intercrosses for *MommeD1*, *MommeD43* and *MommeD43-GFP*. *MommeD43* abbreviated to *MD43*. *MommeD1* abbreviated to *MD1*. Source data are provided as a Source Data file.

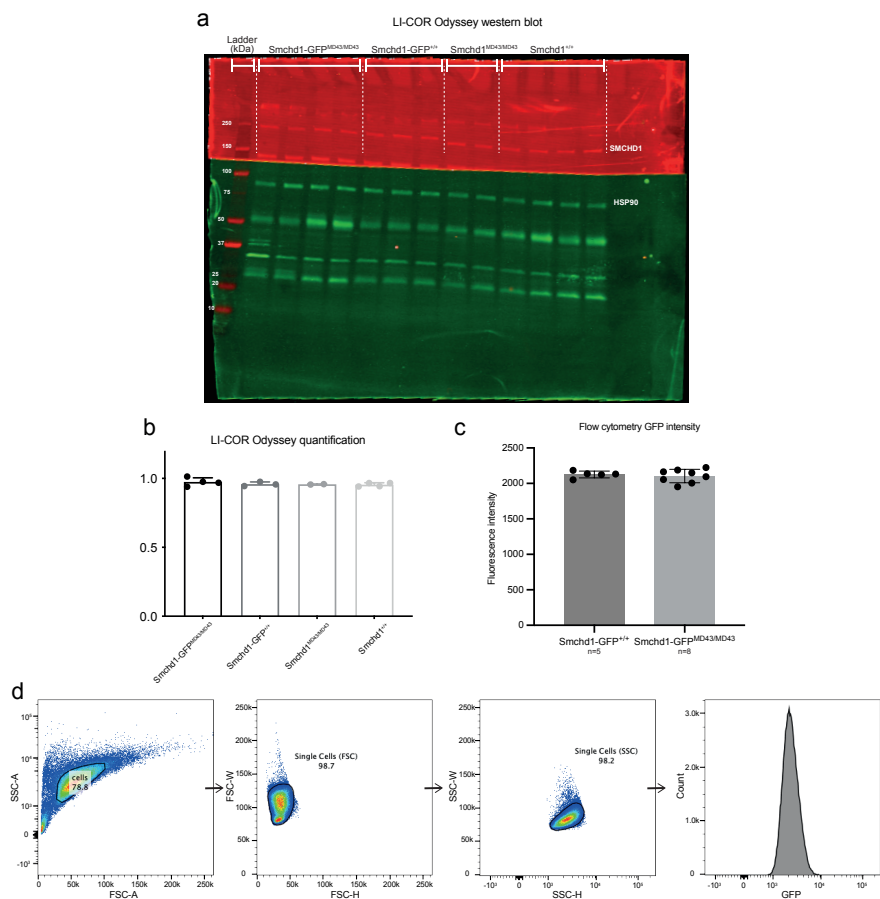

**Supplementary Figure 2.** a. LI-COR Odyssey quantitative western blot picture to measure levels of SMCHD1 protein in *Smchd1*<sup>GFP-MommeD43/GFP-MommeD43</sup>, *Smchd1*<sup>GFP/GFP</sup>, *Smchd1*<sup>MommeD43/MommeD43</sup> and *Smchd1*<sup>+/+</sup> primary MEFs (side-by-side lanes of the same genotype are biological replicates). b. Quantification (mean +/- SD) of the LI-COR Odyssey western blot shown in a. c. Median GFP fluorescence intensity in *Smchd1*<sup>GFP-MommeD43/GFP-MommeD43</sup> and *Smchd1*<sup>GFP/GFP</sup> primary MEFs measured by flow cytometry showing the same levels of SMCHD1 protein. Number of biological replicates (cell lines derived from different embryos) indicated below (mean +/- SD). d. Gating strategy for data shown in c. *MommeD43* abbreviated to *MD43*. Source data are provided as a Source Data file.

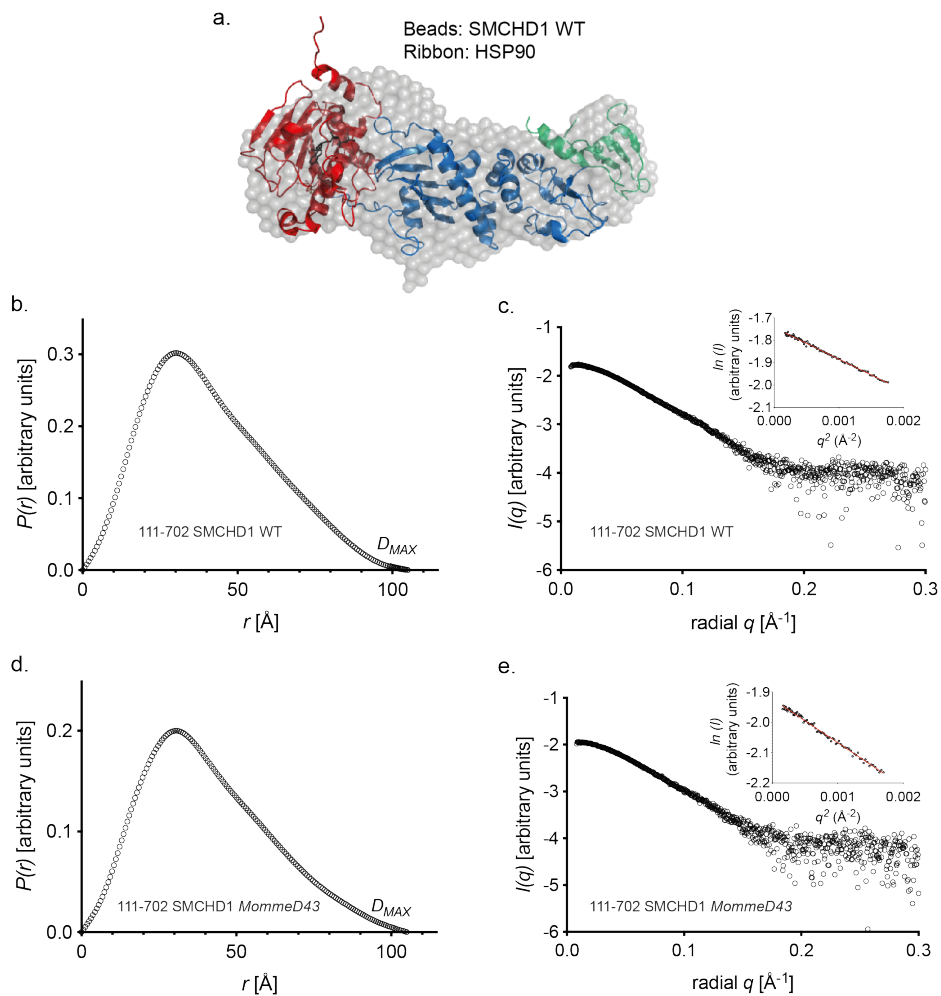

**Supplementary Figure 3.** a. Bead model of the extended ATPase domain (residues 111-702) of murine wild-type SMCHD1; data in b-e indicate SMCHD1 *MommeD43* has the same gross topology. Overlaid is the ribbon structure of the highly related GHKL ATPase domain of HSP90. b., d. Distance distribution function  $P(r)$  calculated from data shown in c. for wild-type SMCHD1 and e. for SMCHD1 *MommeD43*. c., e. Experimental scattering curves (black circles) of the recombinant ATPase domain (residues 111-702) of SMCHD1 WT and SMCHD1 *MommeD43* respectively. On the right upper corner are the corresponding Guinier plots with the trend line from linear regression in red. Source data are provided as a Source Data file.

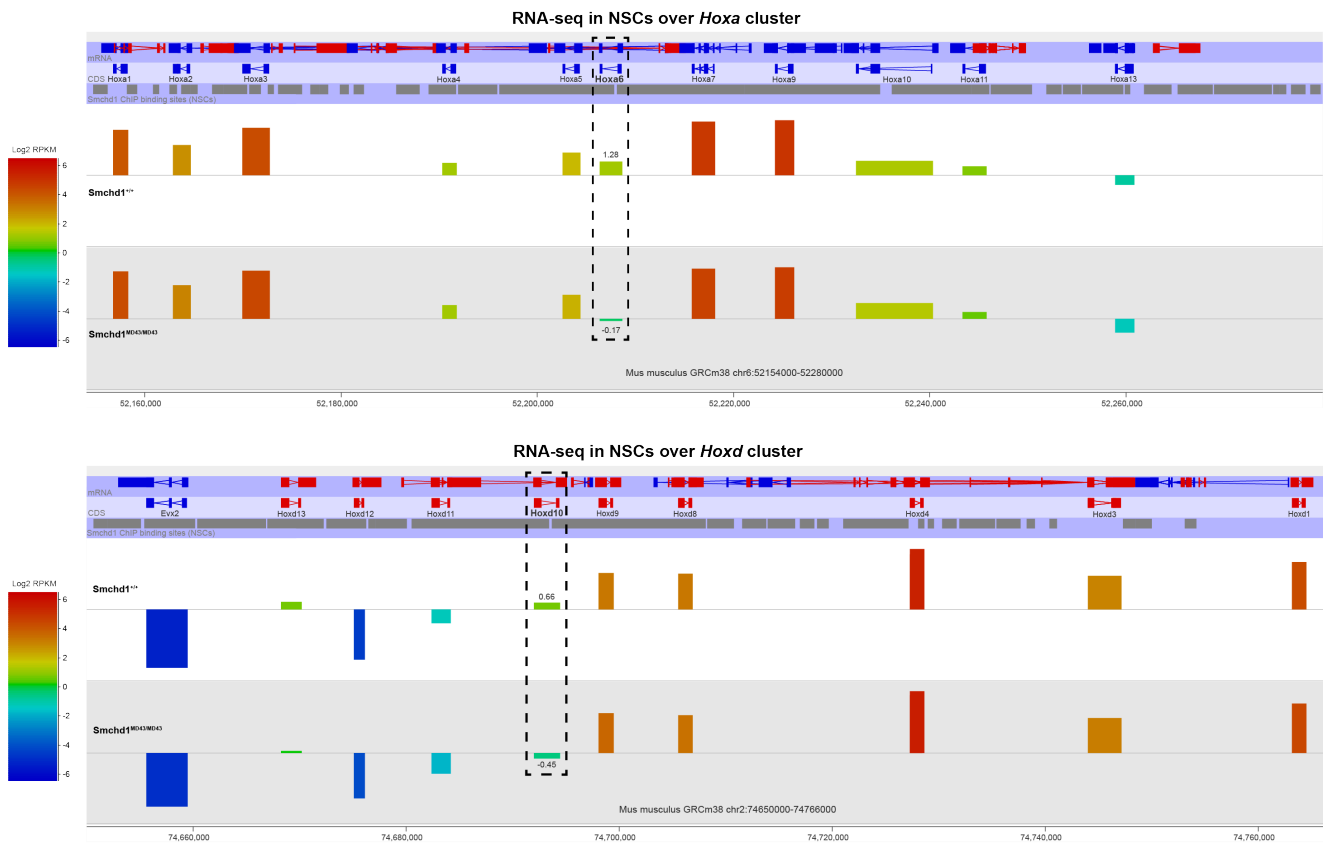



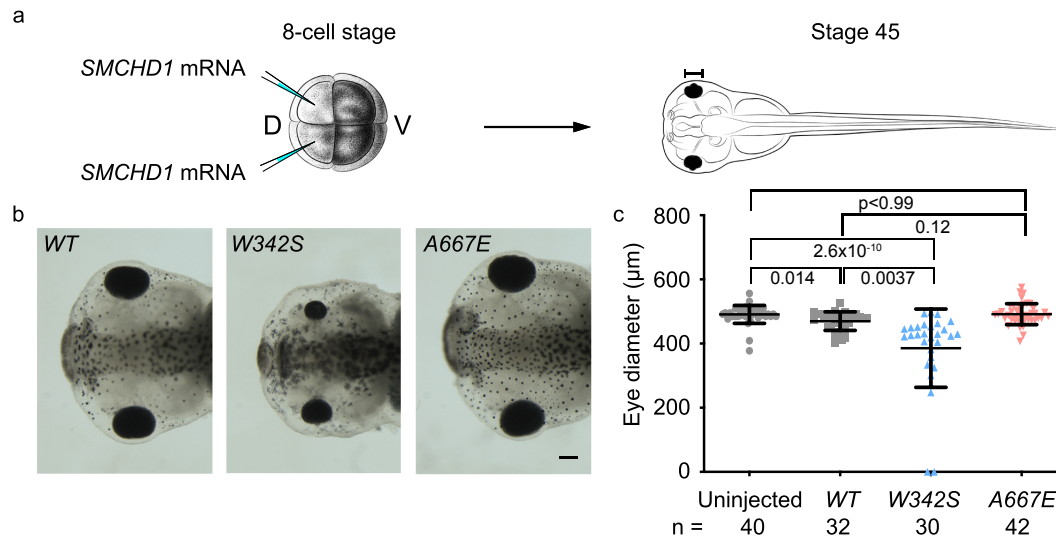

**Supplementary Figure 6.** Overexpression of *MommeD43* (A667E) mutation in *Xenopus laevis* embryos does not cause craniofacial anomalies. a. Schematic of experiment. *SMCHD1* mRNA was injected into the two dorsal (D) animal blastomeres at the 8-cell stage to target the future head of the tadpole. Eye diameters of the tadpoles were observed at Stage 45. b. Representative pictures of tadpoles injected with *SMCHD1* carrying various mutations. Scale bar represent 200 µm. c. Measurements of eye diameters in tadpoles injected with various *SMCHD1* mRNA. W342S is a BAMS mutation, A667E is the *MommeD43* mutation. Results are given as means ± standard deviation, *p* values of each comparison under brackets (Kruskal-Wallis test with Dunn's correction for multiple comparison). Source data are provided as a Source Data file. *Xenopus* illustrations adapted from Xenbase and Zahn et al. (2022).

Xenbase ([www.xenbase.org](http://www.xenbase.org) RRID:SCR\_003280)

Zahn et al., Normal Table of *Xenopus* development: a new graphical resource. *Development* (2022) 149 (14): dev200356. <https://doi.org/10.1242/dev.200356>.

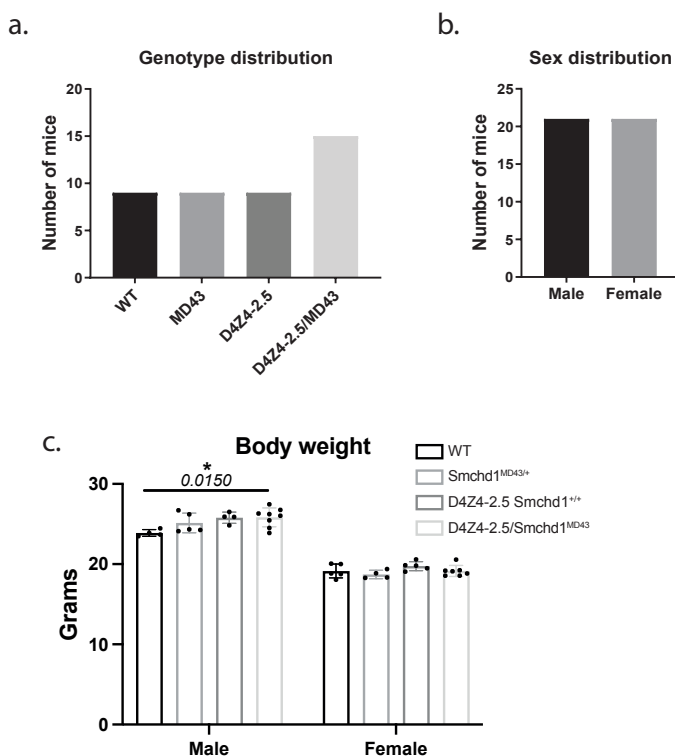

**Supplementary Figure 7:** a. Genotype distribution was not disturbed as tested by a Pearson's chi-squared test. b. An equal number of male (N=21) and female (N=21) mice were born. c. Body weight (in grams) of male and female mice at two months of age. Bars represent the average body weight per genotype; error bars denote the standard deviation. Statistical analysis was performed by two-way ANOVA followed by a

Sidak's test for post hoc analysis. WT = wild-type; MD43 = *Smchd1*<sup>MommeD43/+</sup>. \*P < 0.05, exact value indicated over bar. Source data are provided as a Source Data file.

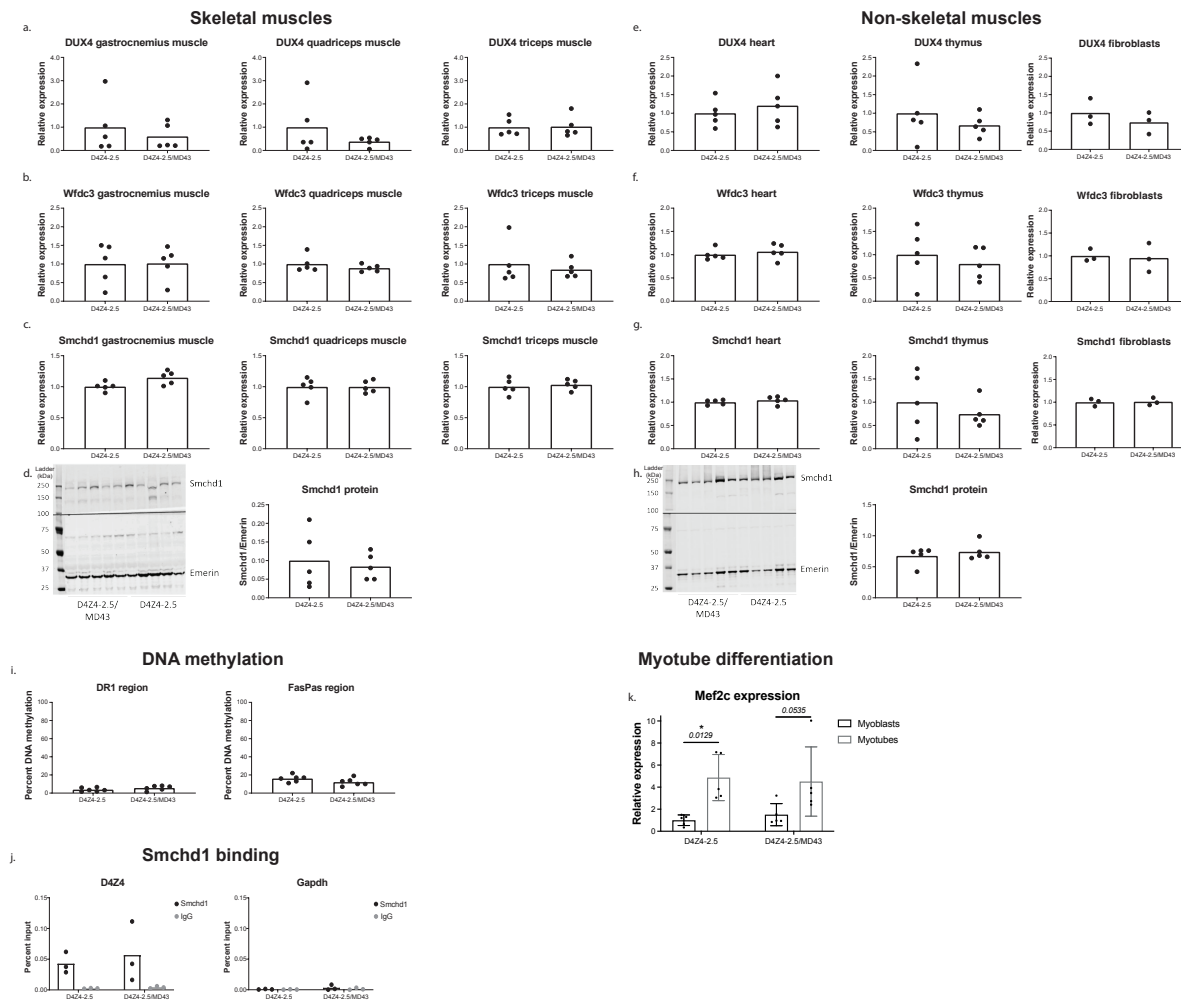

**Supplementary Figure 8:** a-c. Relative *DUX4* (a), *Wfdc3* (b), and *Smchd1* (c) transcript levels in three different skeletal muscles (gastrocnemius, quadriceps, triceps). d. SMCHD1 protein levels in tibialis anterior muscle. EMERIN was used as a loading control. e-g. Relative *DUX4* (e), *Wfdc3* (f), and *Smchd1* (g) transcript levels in heart, thymus and fibroblast cultures. h. SMCHD1 protein levels in spleen. EMERIN was used as a loading control. i. The average DNA methylation level of 19 CpG dinucleotides within the D4Z4 repeat (the DR1 region) and of 10 CpG dinucleotides just distal to the D4Z4 repeat (the FasPas region) in tail DNA. j. SMCHD1 binding at the *D4Z4* repeat and the *Gapdh* locus in fibroblast cultures. Bars represent the average DNA methylation levels or the SMCHD1 enrichment levels per genotype; each dot represents a single mouse. Bars represent the average transcript/protein levels per genotype (average value in D4Z4-2.5 group is set as 1 in a-c and e-g); each dot represents a single mouse (a-j). k. Relative *Mef2c* expression in myoblast and myotube cultures, two-tailed p values shown above (\* denotes statistical significance). Bars represent the average transcript level per genotype (average value in D4Z4-2.5 myoblasts is set as 1); error bars denote the standard deviation. Statistical analysis was performed using a Student's t-test (a-j; except for the fibroblast cultures where a non-parametric Mann-Whitney U-test was used due to low sample number) or a two-way ANOVA followed by a Sidak's test for post hoc analysis. MD43 = *Smchd1*<sup>MommeD43/+</sup>. Source data are provided as a Source Data file.

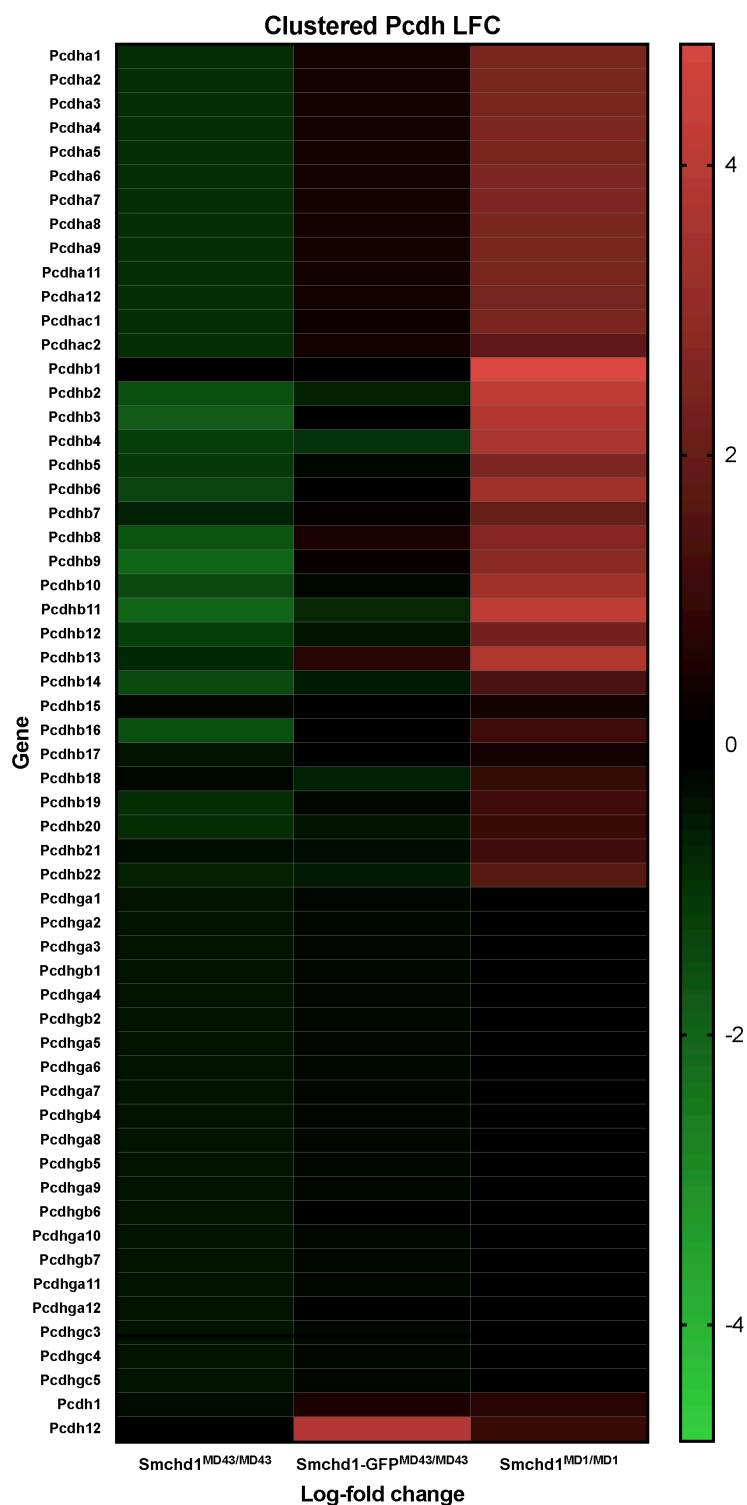

**Supplementary Figure 9.** Heatmap of log-fold change of clustered protocadherin genes in murine chromosome 18. The data is log<sub>2</sub> normalized RPKM expression from mRNA sequencing data in *Smchd1*<sup>MommeD43/MommeD43</sup>, *Smchd1*<sup>MommeD43-GFP/MommeD43-GFP</sup> and *Smchd1*<sup>MommeD1/MommeD1</sup> NSCs versus their independent controls *Smchd1*<sup>+/+</sup>, *Smchd1*<sup>GFP/GFP</sup> and *Smchd1*<sup>+/+</sup>, respectively. *MommeD43* abbreviated to *MD43*.

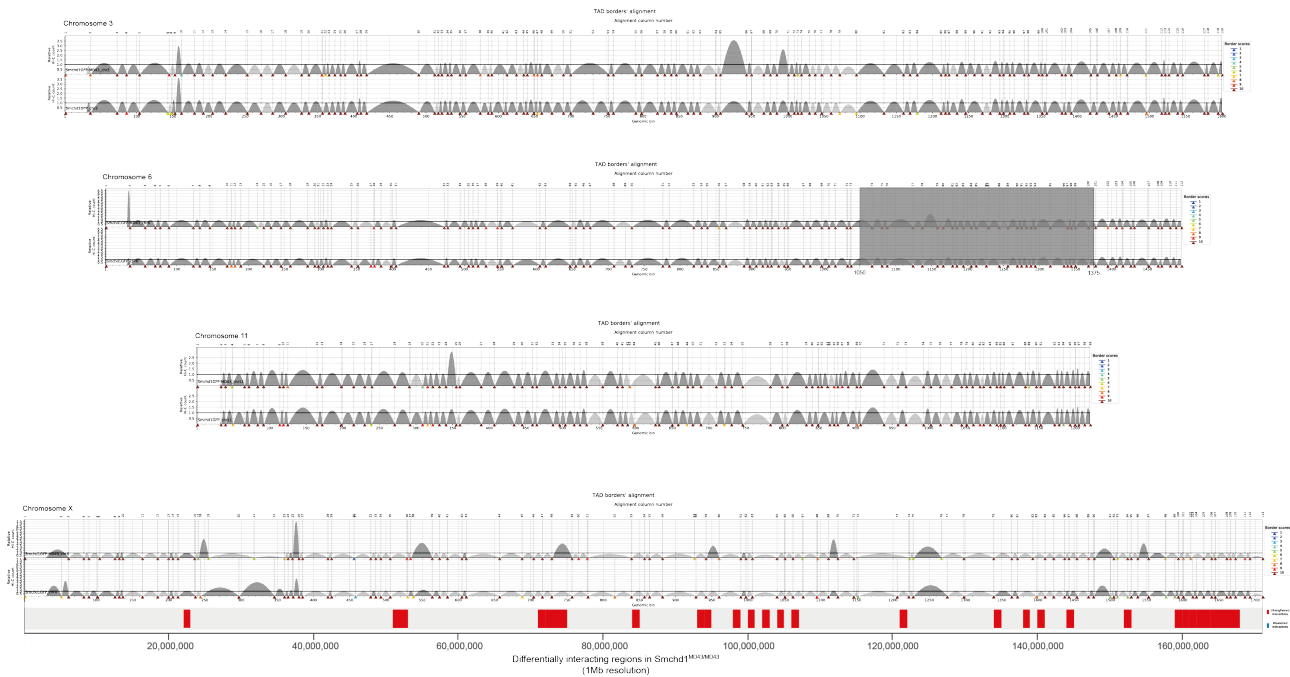

**Supplementary Figure 10.** TAD alignment diagrams from TADbit for chromosomes 3, 6, 11 and X at 100kb resolution. Each diagram shows an individual chromosome with TADs calculated from 3 merged biological replicates for *Smchd1-GFP<sup>MommeD43</sup>/GFP-MommeD43* (top) and *Smchd1-GFP<sup>+/+</sup>* NSCs (bottom). TADs with relative Hi-C count >1 are in dark grey. The arrows on the X-axis represent TAD borders, their colour represents their statistical significance (border scores with 10 being highest significance). The Chr6:105Mb-137.5Mb region is greyed out as it was excluded from all analyses because of a chromosomal rearrangement present in the *Smchd1-GFP<sup>MD43/MD43</sup>* mouse colony. The units of the X-axis are genomic bins equal to the resolution (100kb). In addition, below the X chromosome's TAD alignment there is a track showing the statistically significant differentially interacting regions found in HiC data at 1Mb resolution in *Smchd1-GFP<sup>MD43/MD43</sup>* compared to *Smchd1-GFP<sup>+/+</sup>* NSCs (31 differential interactions FDR<0.1, all strengthened in *Smchd1-GFP<sup>MommeD43-MommeD43</sup>*). *MommeD43* abbreviated to *MD43*.



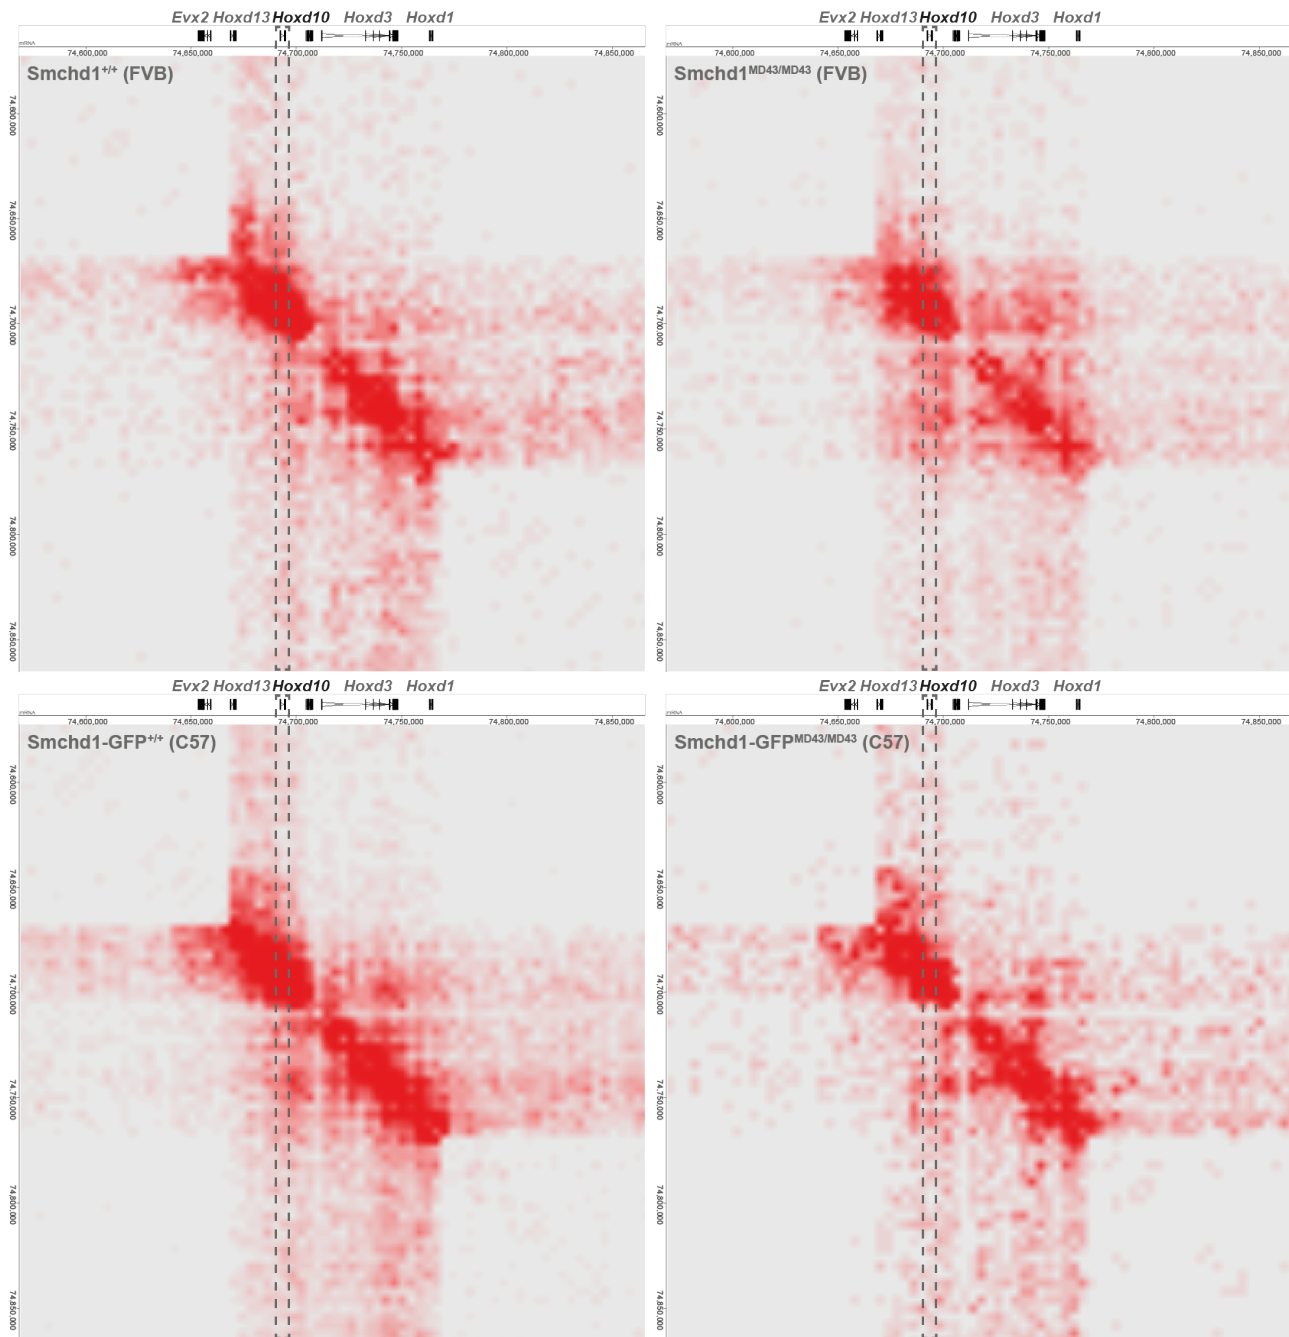

**Supplementary Figure 11.** Heatmaps of Capture-C interactions centered on the *Hoxd* cluster (*mm10* chr2:74668309-74765142) in pre-somitic mesoderm tissue from somite-matched embryos (E8.5). On top of each heatmap, a genome browser track shows some of the genes in the region. The dotted line encompasses interactions involving the *Hoxd10* locus, which showed altered expression in this tissue.

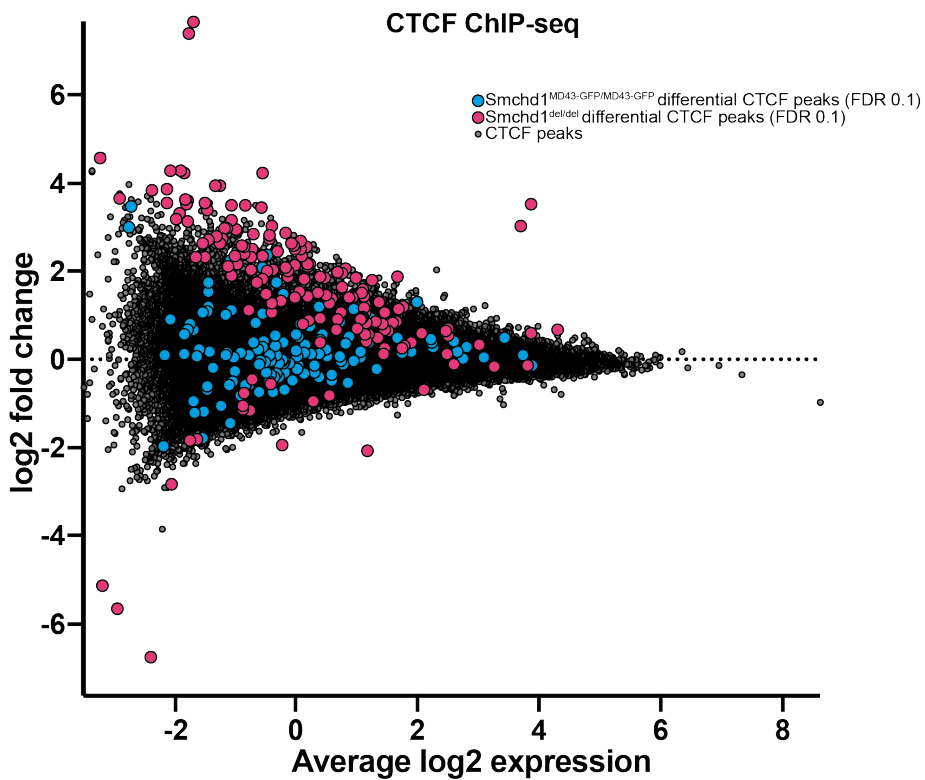

**Supplementary Figure 12.** MA plot showing normalized CTCF ChIP-seq values over peaks. On the x-axis, *Smchd1*<sup>del/del</sup> - *Smchd1*<sup>GFP/GFP</sup> log<sub>2</sub> fold-change, and on the y-axis the average between them. Highlighted are peaks showing statistically significant differential binding, in cyan for *Smchd1*<sup>MD43-GFP/MD43-GFP</sup>, and in magenta those found in *Smchd1*<sup>del/del</sup>, both compared to *Smchd1*<sup>GFP/GFP</sup> (FDR 0.1).

## Supplementary Tables:

### Supplementary table 1

#### List of experiments with genotypes in which they have been replicated

| Experiment                                             | Genotypes studied                                                                                                                                                                            | Tissue/cell type         | Comments                                                                                                                                           |
|--------------------------------------------------------|----------------------------------------------------------------------------------------------------------------------------------------------------------------------------------------------|--------------------------|----------------------------------------------------------------------------------------------------------------------------------------------------|
| Mouse genotype distribution data                       | <i>Smchd1</i> <sup>+/+</sup> (FVB/NJ)<br><i>Smchd1</i> <sup>MD43/MD43</sup> (FVB/NJ)<br><i>Smchd1</i> <sup>GFP/GFP</sup> (C57BL6/J)<br><i>Smchd1</i> <sup>MD43-GFP/MD43-GFP</sup> (C57BL6/J) | Mice                     |                                                                                                                                                    |
| LI-COR Odyssey Western Blots for SMCHD1 protein levels | <i>Smchd1</i> <sup>+/+</sup> (FVB/NJ)<br><i>Smchd1</i> <sup>MD43/MD43</sup> (FVB/NJ)<br><i>Smchd1</i> <sup>GFP/GFP</sup> (C57BL6/J)<br><i>Smchd1</i> <sup>MD43-GFP/MD43-GFP</sup> (C57BL6/J) | Neural Stem Cells (NSCs) |                                                                                                                                                    |
| Smchd1 ChIP-seq                                        | <i>Smchd1</i> <sup>GFP/GFP</sup> (C57BL6/J)<br><i>Smchd1</i> <sup>MD43-GFP/MD43-GFP</sup> (C57BL6/J)                                                                                         | Female NSCs              | Used anti-GFP antibody. Not feasible in FVB/NJ relevant genotypes as there was no available anti-SMCHD1 antibody that worked for ChIP at the time. |

|                                                                                                                          |                                                                                                                                                                                                                                                                                    |                                                                                                                                                                                    |                                                                                                                                                                                                |
|--------------------------------------------------------------------------------------------------------------------------|------------------------------------------------------------------------------------------------------------------------------------------------------------------------------------------------------------------------------------------------------------------------------------|------------------------------------------------------------------------------------------------------------------------------------------------------------------------------------|------------------------------------------------------------------------------------------------------------------------------------------------------------------------------------------------|
| ATPase assay                                                                                                             | Recombinant extended ATPase domain of Smchd1                                                                                                                                                                                                                                       | Purified recombinant protein                                                                                                                                                       |                                                                                                                                                                                                |
| SAXS                                                                                                                     | Recombinant extended ATPase domain of Smchd1                                                                                                                                                                                                                                       | Purified recombinant protein                                                                                                                                                       |                                                                                                                                                                                                |
| Skeletal preparations for morphology study                                                                               | <i>Smchd1</i> <sup>+/-</sup> (FVB/NJ)<br><i>Smchd1</i> <sup>MD43/MD43</sup> (FVB/NJ)                                                                                                                                                                                               | Mouse E17.5 embryos                                                                                                                                                                | C57BL6J wild-type mice have frequent skeletal defects, therefore a very large number of embryos would be required to separate <i>MommeD43</i> -specific phenotypes in mice of that background. |
| RNA-seq in pre-somitic mesoderm (PSM)                                                                                    | <i>Smchd1</i> <sup>+/-</sup> (FVB/NJ)<br><i>Smchd1</i> <sup>MD43/MD43</sup> (FVB/NJ)                                                                                                                                                                                               | Tailbuds containing PSM from somite-matched E8.5 embryos                                                                                                                           | Matched to the background used for skeletal preps. Embryology is easier in more robust FVB/N background lines which have larger litters.                                                       |
| HREM craniofacial morphology                                                                                             | <i>Smchd1</i> <sup>+/-</sup> (FVB/NJ)<br><i>Smchd1</i> <sup>MD43/+</sup> (FVB/NJ)<br><i>Smchd1</i> <sup>MD43/MD43</sup> (FVB/NJ)                                                                                                                                                   | Mouse E14.5 embryos                                                                                                                                                                |                                                                                                                                                                                                |
| Smchd1 overexpression in <i>Xenopus</i>                                                                                  | <i>Xenopus laevis</i>                                                                                                                                                                                                                                                              | <i>Xenopus</i> embryos<br>mRNA injected was human SMCHD1 with introduced mutations                                                                                                 |                                                                                                                                                                                                |
| RNA-seq in frontonasal prominence (FNP)                                                                                  | <i>Smchd1</i> <sup>+/-</sup> (FVB/NJ)<br><i>Smchd1</i> <sup>MD43/MD43</sup> (FVB/NJ)                                                                                                                                                                                               | FNP from somite-matched E10.5 embryos at the 29 somite stage                                                                                                                       |                                                                                                                                                                                                |
| Effects on DUX4 expression                                                                                               | D4Z4-2.5/ <i>Smchd1</i> <sup>+/-</sup><br>D4Z4-2.5/ <i>Smchd1</i> <sup>MD43/+</sup>                                                                                                                                                                                                | Mice<br>Gastrocnemius, quadriceps and triceps<br>Cultured EDL muscle cells (myoblasts and differentiating myotubes)<br>Cerebellum, heart, spleen, thymus, fibroblast cell cultures | F1 cross C57BL6/J x FVB/NJ mouse strain, <i>MommeD43</i> allele from the FVB/NJ line.                                                                                                          |
| RNA-seq in NSCs                                                                                                          | <i>Smchd1</i> <sup>+/-</sup> (FVB/NJ)<br><i>Smchd1</i> <sup>MD43/MD43</sup> (FVB/NJ)<br><i>Smchd1</i> <sup>GFP/GFP</sup> (C57BL6/J)<br><i>Smchd1</i> <sup>MD43-GFP/MD43-GFP</sup> (C57BL6/J)<br><i>Smchd1</i> <sup>+/-</sup> (FVB/NJ)<br><i>Smchd1</i> <sup>MD1/MD1</sup> (FVB/NJ) | NSCs                                                                                                                                                                               |                                                                                                                                                                                                |
| <i>in situ</i> HiC in NSCs                                                                                               | <i>Smchd1</i> <sup>GFP/GFP</sup> (C57BL6/J)<br><i>Smchd1</i> <sup>MD43-GFP/MD43-GFP</sup> (C57BL6/J)                                                                                                                                                                               | Female NSCs                                                                                                                                                                        |                                                                                                                                                                                                |
| DNA FISH                                                                                                                 | <i>Smchd1</i> <sup>+/-</sup> (FVB/NJ)<br><i>Smchd1</i> <sup>MD43/MD43</sup> (FVB/NJ)<br><i>Smchd1</i> <sup>GFP/GFP</sup> (C57BL6/J)<br><i>Smchd1</i> <sup>MD43-GFP/MD43-GFP</sup> (C57BL6/J)<br><i>Smchd1</i> <sup>MD1</sup> (FVB/NJ)<br><i>Smchd1</i> <sup>del/del</sup> (FVB/NJ) | NSCs                                                                                                                                                                               | Results shown in Figure 5.i. are aggregated between strain backgrounds since they showed the same distribution.                                                                                |
| Capture-C in pre-somitic mesoderm (PSM) from somite-matched E8.5 embryos                                                 | <i>Smchd1</i> <sup>+/-</sup> (FVB/NJ)<br><i>Smchd1</i> <sup>MD43/MD43</sup> (FVB/NJ)<br><i>Smchd1</i> <sup>GFP/GFP</sup> (C57BL6/J) and<br><i>Smchd1</i> <sup>MD43-GFP/MD43-GFP</sup> (C57BL6/J)                                                                                   | Tailbud containing PSM from somite-matched (7-9 somites range) E8.5 embryos                                                                                                        |                                                                                                                                                                                                |
| RRBS in NSCs                                                                                                             | <i>Smchd1</i> <sup>+/-</sup> (FVB/NJ)<br><i>Smchd1</i> <sup>MD43/MD43</sup> (FVB/NJ)                                                                                                                                                                                               | Female NSCs                                                                                                                                                                        |                                                                                                                                                                                                |
| H3K27me3 ChIP-seq                                                                                                        | <i>Smchd1</i> <sup>GFP/GFP</sup> (C57BL6/J) and<br><i>Smchd1</i> <sup>MD43-GFP/MD43-GFP</sup> (C57BL6/J)                                                                                                                                                                           | Female NSCs                                                                                                                                                                        | Matched to <i>in situ</i> HiC data.                                                                                                                                                            |
| CTCF ChIP-seq                                                                                                            | <i>Smchd1</i> <sup>GFP/GFP</sup> (C57BL6/J),<br><i>Smchd1</i> <sup>MD43-GFP/MD43-GFP</sup> (C57BL6/J) and<br><i>Smchd1</i> <sup>del/del</sup> (C57BL6/J)                                                                                                                           | Female NSCs                                                                                                                                                                        |                                                                                                                                                                                                |
| Immunofluorescence for H3K27me3 and SMCHD1                                                                               | <i>Smchd1</i> <sup>+/-</sup> (FVB/NJ)<br><i>Smchd1</i> <sup>MD43/MD43</sup> (FVB/NJ)<br><i>Smchd1</i> <sup>GFP/GFP</sup> (C57BL6/J)<br><i>Smchd1</i> <sup>MD43-GFP/MD43-GFP</sup> (C57BL6/J)<br><i>Smchd1</i> <sup>MD1</sup> (FVB/NJ)<br><i>Smchd1</i> <sup>del/del</sup> (FVB/NJ) | Female NSCs                                                                                                                                                                        |                                                                                                                                                                                                |
| Positional cloning in conjunction with linkage analysis utilising SNP chip technology followed by whole exome sequencing | <i>Smchd1</i> <sup>+/-</sup> (FVB/NJ)<br><i>Smchd1</i> <sup>MD43/MD43</sup> (FVB/NJ)                                                                                                                                                                                               | Mouse tissue samples for genotyping                                                                                                                                                |                                                                                                                                                                                                |
| Nanopore sequencing                                                                                                      | <i>Smchd1</i> <sup>+/-</sup> (FVB/NJ)<br><i>Smchd1</i> <sup>MD43/MD43</sup> (FVB/NJ)                                                                                                                                                                                               | Olfactory bulb from adult littermates                                                                                                                                              | Resequencing to verify no off-target mutations in linkage region                                                                                                                               |

|  |  |                                  |
|--|--|----------------------------------|
|  |  | from ENU generation of MommeD43. |
|--|--|----------------------------------|

## Supplementary table 2

### Data collection and scattering parameters for SAXS analysis

| Data collection parameters               |                                                                    |                          |
|------------------------------------------|--------------------------------------------------------------------|--------------------------|
| Instrument                               | Australian Synchrotron SAXS/WAXS beamline                          |                          |
| Beam geometry                            | 120 $\mu\text{m}$ point source                                     |                          |
| Beam wavelength ( $\text{\AA}$ )         | 1.033                                                              |                          |
| $q$ range ( $\text{\AA}^{-1}$ )          | 0.0114-0.4                                                         |                          |
| Exposure (seconds)                       | time                                                               | 2                        |
| Protein concentration                    | ~5 mg/ml sample injected via in-line size exclusion chromatography |                          |
| Temperature ( $^{\circ}\text{C}$ )       | 16                                                                 |                          |
| Structural parameters                    |                                                                    |                          |
| Protein sample                           | SMCHD1 111-702 WT                                                  | SMCHD1 111-702 A667E     |
| $I(0)(\text{cm}^{-1})$<br>[from Guinier] | 0.01806<br>$\pm 0.00013$                                           | 0.01196<br>$\pm 0.00012$ |
| $R_g$ ( $\text{\AA}$ )<br>[from Guinier] | 31.2<br>$\pm 0.344$                                                | 31.7<br>$\pm 0.484$      |
| $I(0)(\text{cm}^{-1})$<br>[from $P(r)$ ] | 0.01825<br>$\pm 0.00009$                                           | 0.01198<br>$\pm 0.00008$ |
| $R_g$ ( $\text{\AA}$ )<br>[from $P(r)$ ] | 32.17<br>$\pm 0.206$                                               | 32.21<br>$\pm 0.273$     |
| $D_{max}$ ( $\text{\AA}$ )               | 105                                                                | 105                      |
| Software                                 |                                                                    |                          |
| Primary data reduction                   | ScatterBrain (Australia Synchrotron)                               |                          |
| Data processing                          | PRIMUS, GNOM                                                       |                          |

### Supplementary Table 3. Oligonucleotide sequences

| Oligo name     | Purpose                   | Sequence                           |
|----------------|---------------------------|------------------------------------|
| D4Z4 gen F     | D4Z4 transgene genotyping | 5'- TGGTCCGTGAAGACATGTGT-3'        |
| D4Z4 gen R     | D4Z4 transgene genotyping | 5'- GAGCCCTCAGAGAAGTGGG-3'         |
| Smchd1 ex 15F  | MommeD43 genotyping       | 5'-TTGTCTTATTTGCAATGTTGGTG-3'      |
| Smchd1 ex 15R  | MommeD43 genotyping       | 5'-GCTACAGTGCCCTAGCCCAAT-3'        |
| MommeD43 probe | MommeD43 genotyping       | 5'-AACTGTGCCCATGCAAAGCTGGATAGGA-3' |
| D4Z4 ChIP F    | D4Z4 ChIP-qPCR            | 5'- CCGCGTCCGTCCGTGAAA-3           |

|                                                  |                                                 |                                  |
|--------------------------------------------------|-------------------------------------------------|----------------------------------|
| D4Z4 ChIP R                                      | D4Z4 ChIP-qPCR                                  | 5'-TCCGTCGCCGTCCTCGTC-3'         |
| Gapdh ChIP F                                     | Gapdh ChIP-qPCR                                 | 5'-TGAGCCTCCTCCAATTCAAC-3'       |
| Gapdh ChIP R                                     | Gapdh ChIP-qPCR                                 | 5'-CCAGGAAGACGCTTGAAAAG-3'       |
| DR1 meth F                                       | D4Z4 DR1 methylation                            | 5'-GGGTTGAGGGTTGGGTTTATA-3'      |
| DR1 meth R                                       | D4Z4 DR1 methylation                            | 5'-ACAAAACCTAACCTAAAAATATAC-3'   |
| Faspas meth F                                    | D4Z4 Faspas methylation                         | 5'-ATAGGGAGGGGTATTTTA-3'         |
| Faspas meth R                                    | D4Z4 Faspas methylation                         | 5'-ACRATCAAAAACATACCTCTATCTA-3'  |
| Otc F                                            | X chromosome genotyping                         | 5'-GTTCTTTCGTTTTCCCCTCTC-3'      |
| Otc R                                            | X chromosome genotyping                         | 5'-GGCATTATCTAAGGAGAAGCATC-3'    |
| Zfy F                                            | Y chromosome genotyping                         | 5'-GACTAGACATGTCTTAACATCTGTCC-3' |
| Zfy R                                            | Y chromosome genotyping                         | 5'-CCTATTGCATGGACAGCAGCTTATG-3'  |
| Smchd1 cKO F2                                    | Smchd1 fl and del genotyping                    | 5'-TCAGGTGGTCTCGAGCCC-3'         |
| Smchd1 cKO F4                                    | Smchd1 fl and del genotyping                    | 5'-CCATGAGAAGCAATGTGGGA-3'       |
| Smchd1 cKO R1                                    | Smchd1 fl and del genotyping                    | 5'-GGACAGCCAAAGTGACACAG-3'       |
| Smchd1 GFP F1                                    | Smchd1-GFP genotyping                           | 5'-GCCTGCCTTGCTTCTATGTC-3'       |
| Smchd1 GFP R1                                    | Smchd1-GFP genotyping                           | 5'-GCCCCATGAGATTCTGAAAG-3'       |
| Smchd1 GFP R2                                    | Smchd1-GFP genotyping                           | 5'-GAATTCAGGGTCAGCTTGC-3'        |
| Momme D1 F                                       | Allelic discrimination for genotyping of Smchd1 | 5'-TCCTCCTTGTGGCCTTGTGG-3'       |
| MommeD1 R                                        | Allelic discrimination for genotyping of Smchd1 | 5'-CGTATTTAAAGGTCCAGCTGTTGC-3'   |
| Taqman Smchd1 wild-type probe used with MommeD1  | Allelic discrimination for genotyping of Smchd1 | VIC-CAGCTTTGGTTGTGCTGT-MGBNFQ    |
| Taqman Smchd1 MommeD1 probe                      | Allelic discrimination for genotyping of Smchd1 | 6FAM-CAGCTTTGGTTATGCTGT-MGBNFQ   |
| Taqman Smchd1 wild-type used with MommeD43 probe | Allelic discrimination for genotyping of Smchd1 | VIC-TCCTATCCAGCTTTGCAAT-MGBNFQ   |
| Taqman Smchd1 MommeD43 probe                     | Allelic discrimination for genotyping of Smchd1 | 6FAM-CCTATCCAGCTTTTCAAT-MGBNFQ   |
| MommeD43 F                                       | Allelic discrimination for genotyping of Smchd1 | 5'-CCCCAGGCACTGTATGATGAAATAA-3'  |

|                               |                                                                                  |                                                                                                                                             |
|-------------------------------|----------------------------------------------------------------------------------|---------------------------------------------------------------------------------------------------------------------------------------------|
|                               |                                                                                  |                                                                                                                                             |
| MommeD43<br>R                 | Allelic discrimination for genotyping of Smchd1                                  | 5'-CATATTCCTAATTGTTTTCTCGGCTACTG-3'                                                                                                         |
| sgRNA<br>MommeD43             | gRNA for CRISPR/Cas9                                                             | 5'-TTGCAAAGCTGGATAGGACA-3'                                                                                                                  |
| Smchd1 exon<br>15<br>MommeD43 | Oligo donor repair template for introducing the MommeD43 mutation by CRISPR/Cas9 | 5'-<br>tgtaaattttattcagGAACCCAGGCACTGTATGA<br>TGAAATAAAAAGTGCCTATTGAAAAGCTGG<br>ATAGGACAGTAGCCGAGAAAACAATTAGGAA<br>ATATGTAGAAGATGAAATGGC-3' |
